# Supplementary material for: A Novel Method for Stimulating Cannabis sativa L. Male Flowers from Female Plants
Source: MDPI journal article supplement (doi:10.3390/plants12193371), 2023-09-25
Supplement: s1 [file s1]

**Table S1.** Male flower counts of each treated plant

| Plant accession | treatment | Flower counts |
|-----------------|-----------|---------------|
| H2020-377-003   | STS       | 585           |
| H2020-377-003   | STS       | 688           |
| H2020-377-003   | STS       | 405           |
| H2021-001-006   | STS       | 391           |
| H2021-001-006   | STS       | 420           |
| H2021-001-006   | STS       | 250           |
| H2020-376-003   | STS       | 595           |
| H2020-376-003   | STS       | 705           |
| H2020-376-003   | STS       | 500           |
| H2020-424-001   | STS       | 540           |
| H2020-424-001   | STS       | 485           |
| H2020-424-001   | STS       | 200           |
| H2020-376-002   | STS       | 565           |
| H2020-376-002   | STS       | Dead          |
| H2020-376-002   | STS       | 275           |
| H2020-425-015   | STS       | 525           |
| H2020-425-015   | STS       | 850           |
| H2020-425-015   | STS       | 150           |
| H2020-377-003   | ALESCO®   | 300           |
| H2020-377-003   | ALESCO®   | 400           |
| H2020-377-003   | ALESCO®   | 725           |
| H2021-001-006   | ALESCO®   | 230           |
| H2021-001-006   | ALESCO®   | 410           |
| H2021-001-006   | ALESCO®   | 295           |
| H2020-376-003   | ALESCO®   | 660           |
| H2020-376-003   | ALESCO®   | 550           |
| H2020-376-003   | ALESCO®   | 500           |
| H2020-424-001   | ALESCO®   | 600           |
| H2020-424-001   | ALESCO®   | 525           |
| H2020-424-001   | ALESCO®   | Dead          |
| H2020-376-002   | ALESCO®   | 400           |
| H2020-376-002   | ALESCO®   | 275           |
| H2020-376-002   | ALESCO®   | 625           |
| H2020-425-015   | ALESCO®   | 625           |
| H2020-425-015   | ALESCO®   | 1000          |
| H2020-425-015   | ALESCO®   | 350           |

**Table S2.** Pollen quality examinations by Acetocarmine and FDA stains.

| <b>Stain</b> | <b>Hemp ID</b> | <b>Treatment</b> | <b>Total pollen<br/>#</b> | <b>Aborted<br/>pollen</b> | <b>Stained<br/>pollen</b> | <b>Proportion<br/>%*</b> |
|--------------|----------------|------------------|---------------------------|---------------------------|---------------------------|--------------------------|
| Acetocarmine | H2020_376_003  | ALESCO®          | 1379                      | 126                       | 1253                      | 90.86 <sup>a</sup>       |
|              |                | STS              | 1129                      | 87                        | 1042                      | 92.29 <sup>a</sup>       |
|              | H2020_425_015  | ALESCO®          | 1201                      | 183                       | 1018                      | 84.76 <sup>b</sup>       |
|              |                | STS              | 1078                      | 218                       | 860                       | 79.78 <sup>b</sup>       |
| FDA          | H2020_376_003  | ALESCO®          | 1348                      | 75                        | 1273                      | 94.44 <sup>A</sup>       |
|              |                | STS              | 1371                      | 160                       | 1211                      | 88.33 <sup>B</sup>       |
|              | H2020_425_015  | ALESCO®          | 939                       | 205                       | 734                       | 78.17 <sup>C</sup>       |
|              |                | STS              | 697                       | 197                       | 500                       | 71.74 <sup>D</sup>       |

\*Upper and lower cases indicate two independent multiple comparisons.
